# Supplementary material for: Purely organic light-harvesting phosphorescence energy transfer by β-cyclodextrin pseudorotaxane for mitochondria targeted imaging
Source: PubMed Central journal article supplement — Chem Sci. 2020 Dec 9;12(5):1851–7. doi: 10.1039/d0sc05343k (PMC8179139; doi:10.1039/d0sc05343k), 2020-12-09
Supplement: SC-012-D0SC05343K-s001.pdf [file SC-012-D0SC05343K-s001.pdf]

## Supporting Information

# **Purely Organic Light-harvesting Phosphorescence Energy Transfer by $\beta$ -Cyclodextrin Pseudorotaxane for Mitochondria Targeted Imaging**

Fang-Fang Shen, Yong Chen, Xianyin Dai, Hao-Yang Zhang, Bing Zhang, Yaohua Liu,

Yu Liu\*

|                                                                                                                                           |    |
|-------------------------------------------------------------------------------------------------------------------------------------------|----|
| 1. Synthesis and characterization of related compounds.                                                                                   | 3  |
| 1.1. Synthesis of CD-PY                                                                                                                   | 3  |
| <b>Figure S1.</b> <sup>1</sup> H NMR spectrum of CD-PY.                                                                                   | 3  |
| <b>Figure S2.</b> <sup>13</sup> C NMR spectrum of CD-PY.                                                                                  | 4  |
| <b>Figure S3.</b> HRMS (ESI) spectrum of CD-PY.                                                                                           | 4  |
| 1.2. Synthesis of HA-ADA                                                                                                                  | 4  |
| <b>Figure S4.</b> <sup>1</sup> H NMR spectrum of HA-ADA.                                                                                  | 5  |
| 2. Figures                                                                                                                                | 5  |
| <b>Figure S5.</b> <sup>1</sup> H- <sup>1</sup> H ROESY spectrum of CD-PY in the presence of 0.5 equiv CB[8].                              | 6  |
| <b>Figure S6.</b> <sup>1</sup> H NMR titration spectra of CD-PY in the presence of CB[7].                                                 | 6  |
| <b>Figure S7.</b> UV/vis spectral changes of CD-PY upon addition of CB[7].                                                                | 7  |
| <b>Figure S8.</b> UV/vis spectral changes of CD-PY upon addition of CB[8].                                                                | 7  |
| <b>Figure S9.</b> Fluorescence lifetime curve of CD-PY and CD-PY@CB[8] at 384 nm.                                                         | 8  |
| <b>Figure S10.</b> Decay curve of CD-PY@CB[7] (1:1) at 510 nm.                                                                            | 8  |
| <b>Figure S11.</b> Calorimetric titrations of injecting CD-PY solution into CB[7] solution.                                               | 9  |
| <b>Figure S12.</b> Calorimetric titrations of injecting CD-PY solution into CB[8] solution.                                               | 9  |
| <b>Figure S13.</b> <sup>1</sup> H NMR spectra of (a) CD-PY@CB[8] (1:0.5), (b) CD-PY@CB[8]@RhB (1:0.5:1), (c) β-CD@RhB (1:1), and (d) RhB. | 10 |
| <b>Figure S14.</b> <sup>1</sup> H NMR spectrum of β-CD@RhB (1:1).                                                                         | 10 |
| <b>Figure S15.</b> Zoomed view of the ROESY spectrum of β-CD: RhB (1:1).                                                                  | 11 |
| <b>Figure S16.</b> The geometry optimized of CD-PY@CB[8]@RhB.                                                                             | 11 |
| <b>Figure S17.</b> Gated emission spectra of CD-PY@CB[8]@RhB (1:0.5:0.02) with or without N <sub>2</sub> in aqueous solution.             | 12 |
| <b>Figure S18.</b> Normalized fluorescence and gated emission spectra of CD-PY@CB[8]@RhB (1:0.5:0.02) in aqueous solution.                | 12 |
| <b>Figure S19.</b> Normalized phosphorescence spectra (delayed 0.1 ms) of CD-PY in solid state with different concentrations of RhB.      | 13 |
| <b>Figure S20.</b> Decay curves of CD-PY in the presence of (a) 1%, and (a) 3% RhB in solid state (Ex =320 nm).                           | 13 |
| <b>Figure S21.</b> Fluorescence lifetime curve of CD-PY@CB[8]@RhB (1: 0.5: 0.02) aqueous solution at 384 nm.                              | 14 |

|                                                                                                                                                                         |    |
|-------------------------------------------------------------------------------------------------------------------------------------------------------------------------|----|
| <b>Figure S22.</b> Gated emission spectra of CD-PY@CB[8]@RhB (1:0.5:0.02) and CD-PY@RhB (1:0.02) in aqueous solution.                                                   | 14 |
| <b>Figure S23.</b> Gated emission spectra of CD-PY@CB[8]@RhB (1:0.5:0.02) upon the gradual addition of HA-ADA in aqueous solution.                                      | 15 |
| <b>Figure S24.</b> Decay curves of (a) CD-PY@CB[8]@RhB (1:0.5:0.02), and (b) CD-PY@CB[8]@RhB@HA-ADA (1:0.5: 0.02:0.31) in water at 500 nm.                              | 15 |
| <b>Table S1.</b> Summary of all lifetimes used by different exponential decay.                                                                                          | 16 |
| <b>Figure S25.</b> Relative cell viabilities of CD-PY@CB[8]@RhB@HA-ADA (1:0.5:0.02:0.31) at different concentrations. (Concentrations in the Figure represent [CD-PY]). | 16 |
| <b>3. Methods</b>                                                                                                                                                       | 16 |
| <b>3.1 Energy-transfer efficiency (<math>\Phi_{ET}</math>).</b>                                                                                                         | 17 |
| <b>Figure S26.</b> Phosphorescence spectra of CD-PY@CB[8] (1:0.5) with or without RhB in water ([CD-PY] = $5 \times 10^{-4}$ M, $E_x = 340$ nm).                        | 17 |
| <b>3.2 Antenna effect.</b>                                                                                                                                              | 17 |
| <b>Figure S27.</b> Phosphorescence spectra of CD-PY@CB[8]@RhB (1:0.5:0.02) Under different excitation conditions in water.                                              | 18 |
| <b>4. References</b>                                                                                                                                                    | 18 |

## Experimental section

### 1. Synthesis and characterization of related compounds

#### 1.1 Synthesis of CD-PY

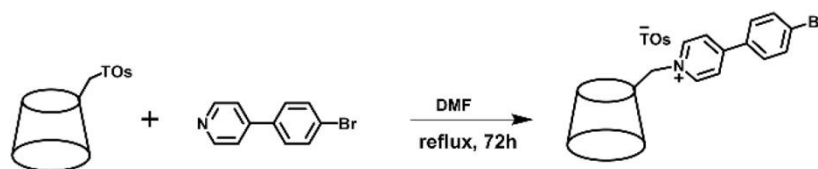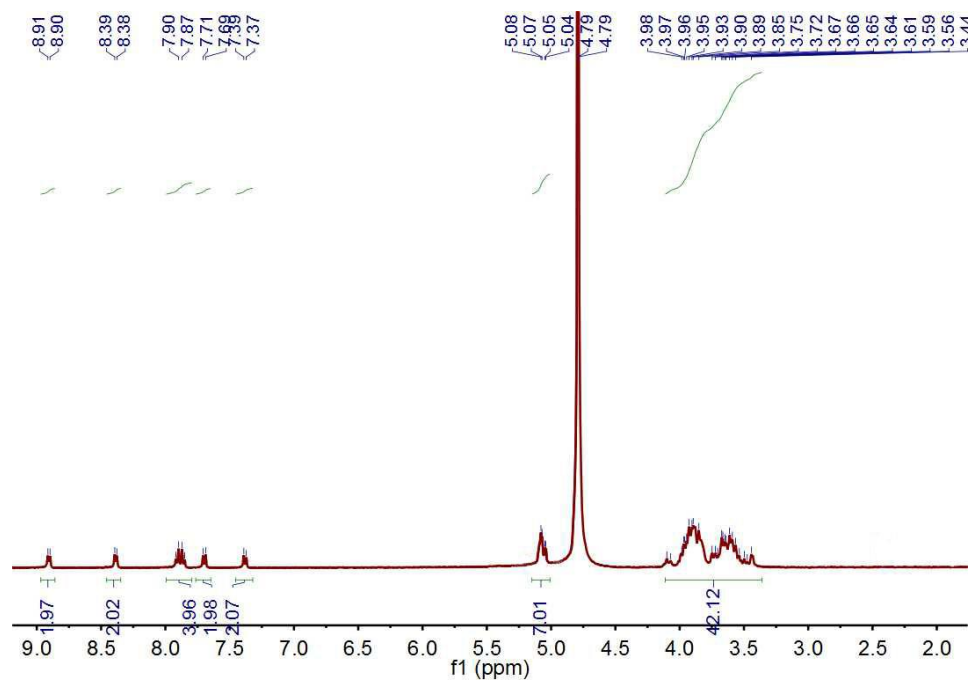

Figure S1 <sup>1</sup>H NMR spectrum of CD-PY (D<sub>2</sub>O, 400 MHz, 298K).

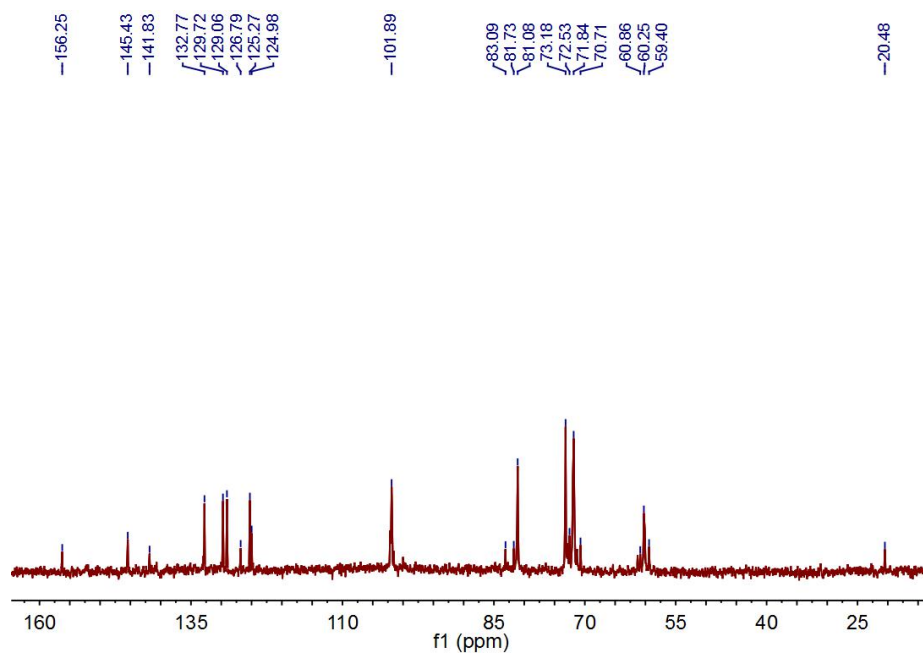

**Figure S2**  $^{13}\text{C}$  NMR spectrum of CD-PY ( $\text{D}_2\text{O}$ , 400 MHz, 298K).

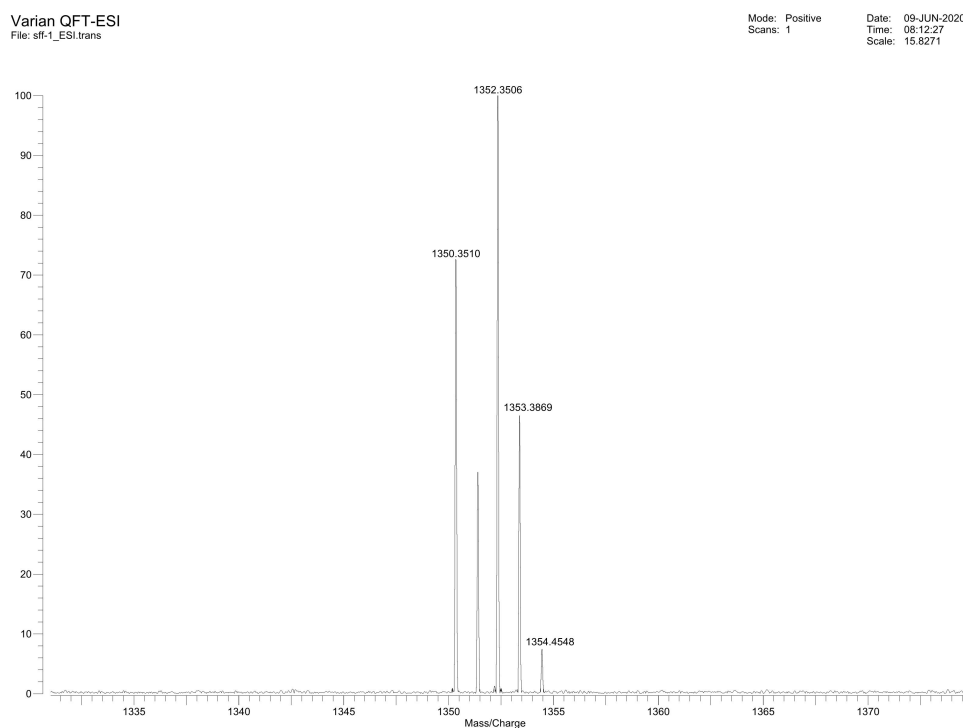

**Figure S3** HRMS (ESI) spectrum of CD-PY.

## 1.2 Synthesis of HA-ADA

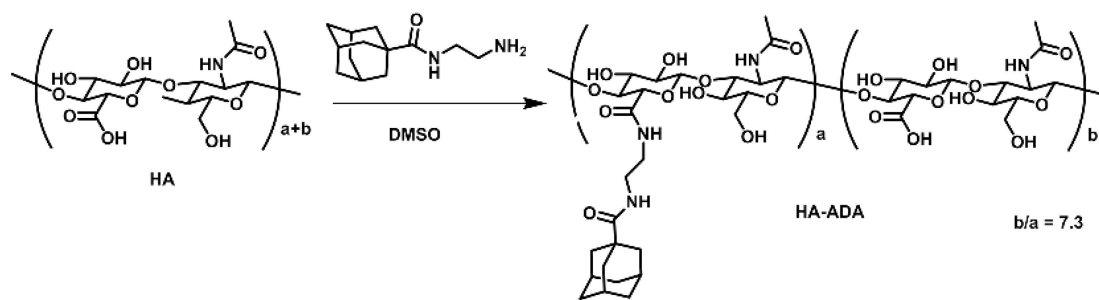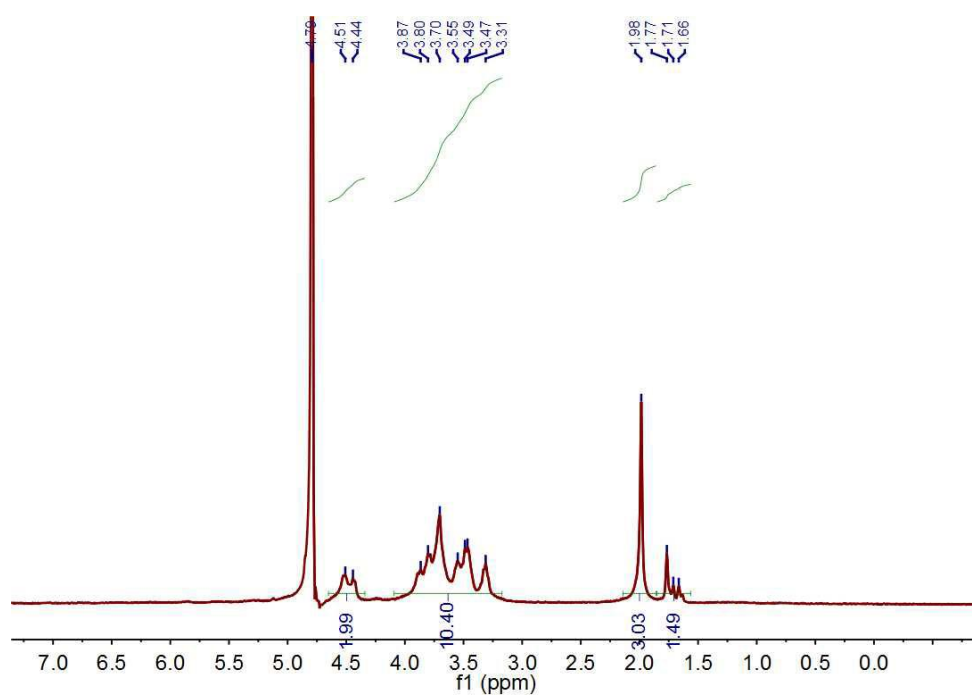

Figure S4  $^1\text{H}$  NMR spectrum of HA-ADA ( $\text{D}_2\text{O}$ , 400 MHz, 298K).

## 2 Figures

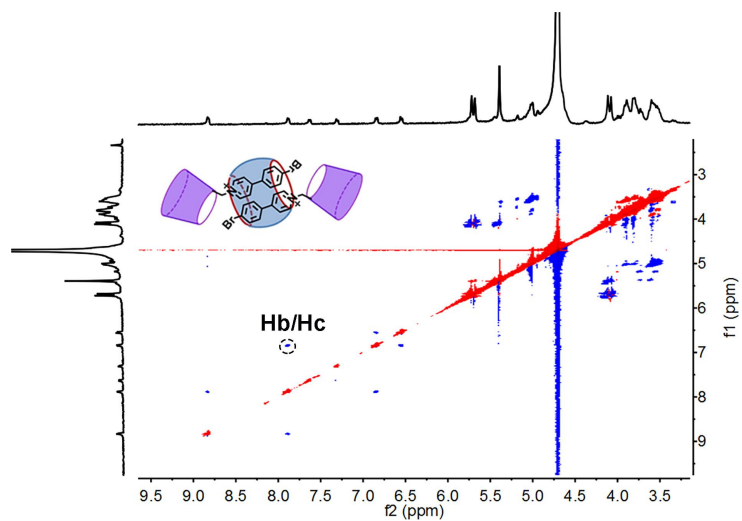

**Figure S5.**  $^1\text{H}$ - $^1\text{H}$  ROESY spectrum of CD-PY in the presence of 0.5 equiv CB[8] (400 MHz,  $\text{D}_2\text{O}$ , 298K,  $[\text{CD-PY}] = 1.0 \text{ mM}$ ).

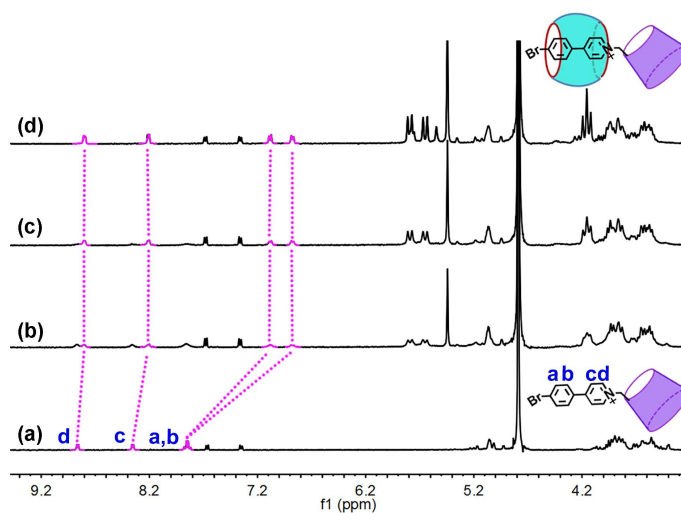

**Figure S6.**  $^1\text{H}$  NMR titration spectra of CD-PY in the presence of (a) 0.00, (b) 0.40, (c) 0.60, (d) 1.00 equiv. of CB[7] (400 MHz,  $\text{D}_2\text{O}$ , 298K,  $[\text{CD-PY}] = 1.0 \text{ mM}$ ).

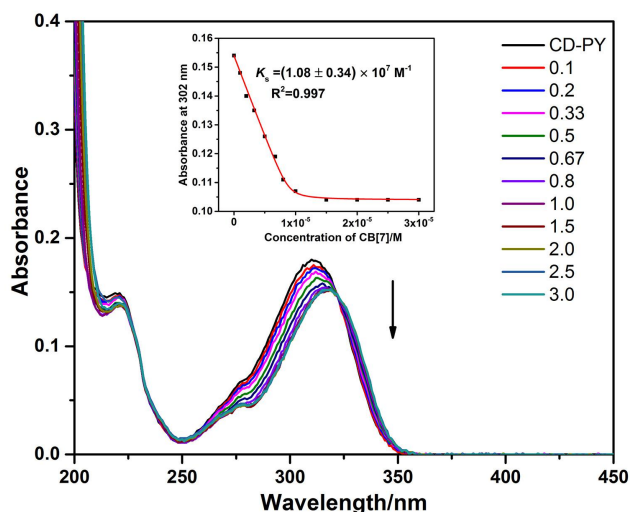

**Figure S7.** UV/vis spectral changes of CD-PY upon addition of CB[7]. The spectral changes were recorded in water. Inset: nonlinear least-squares analysis (“one host, one guest” mode) of the absorbance intensity changes at 302 nm used to calculate the  $K_s$  value between CD-PY and CB[7] in water ( $[\text{CD-PY}] = 1.0 \times 10^{-5} \text{ M}$ ,  $[\text{CB}[7]] = 0\text{--}3.0 \times 10^{-5} \text{ M}$ , 298 K).

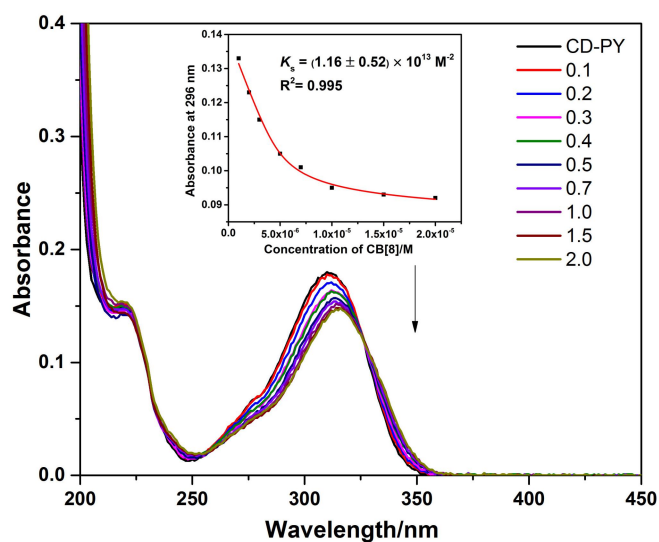

**Figure S8.** UV/vis spectral changes of CD-PY upon addition of CB[8]. The spectral changes were recorded in water. Inset: nonlinear least-squares analysis (“one host, two guest” mode) of the absorbance intensity changes at 296 nm used to calculate the  $K_s$  value between CD-PY and CB[8] in water ( $[\text{CD-PY}] = 1.0 \times 10^{-5} \text{ M}$ ,  $[\text{CB}[8]] = 0\text{--}2.0 \times 10^{-5} \text{ M}$ , 298 K).



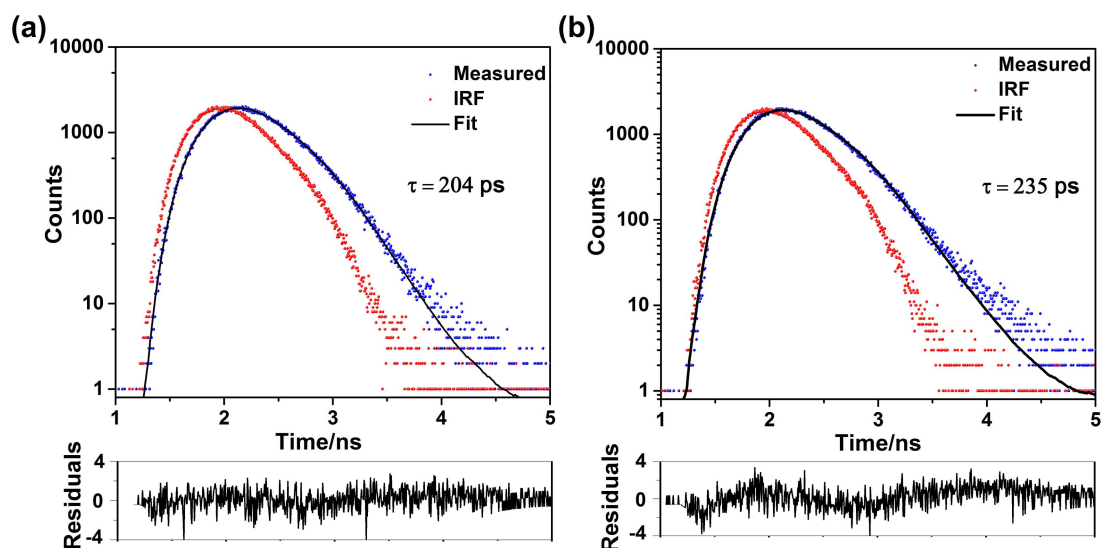

**Figure S9.** Fluorescence lifetime curve of CD-PY and CD-PY@CB[8] (1: 0.5) aqueous solution at 384 nm ( $[CD-PY] = 5.0 \times 10^{-4}$  M, 298 K).

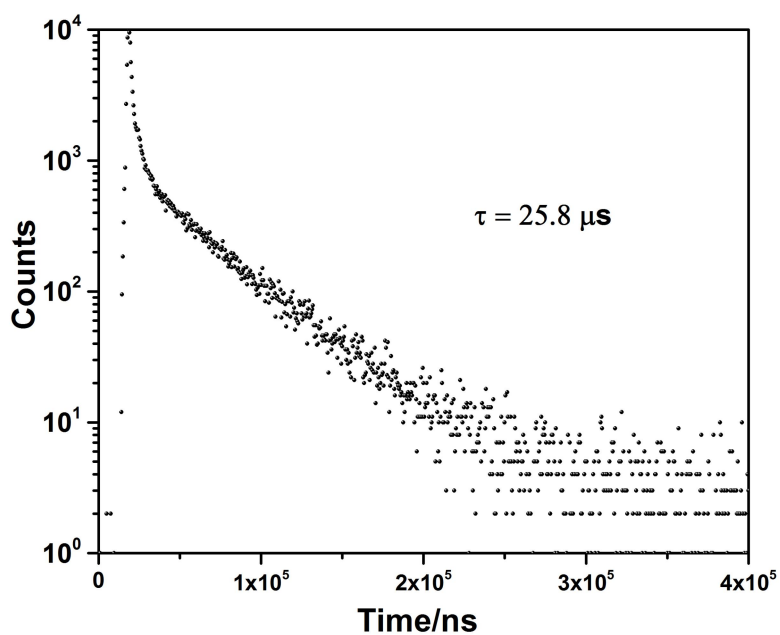

**Figure S10.** Decay curve of CD-PY@CB[7] (1:1) aqueous solution at 510 nm ( $[CD-PY] = 5.0 \times 10^{-4}$  M, 298 K).

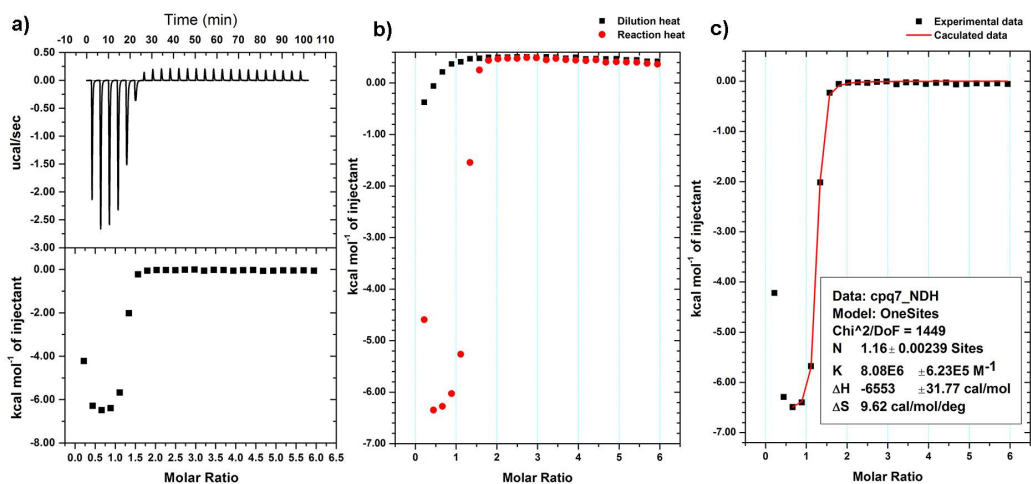

**Figure S11.** (A) Calorimetric titrations in aqueous solution for sequential 25 injections (10  $\mu\text{L}$  per injection) of CD-PY solution (1.25 mM) injecting into CB[7] solution (0.040 mM): (a) raw data and apparent reaction heat; (b) heat effects of the dilution and of the complexation reaction; (c) "Net" heat effects fitted using the "one set of binding sites" model. The thermodynamic data in CD-PY@CB[7] complex were obtained as  $K_s = (8.08 \pm 0.62) \times 10^6 \text{ M}^{-1}$ ,

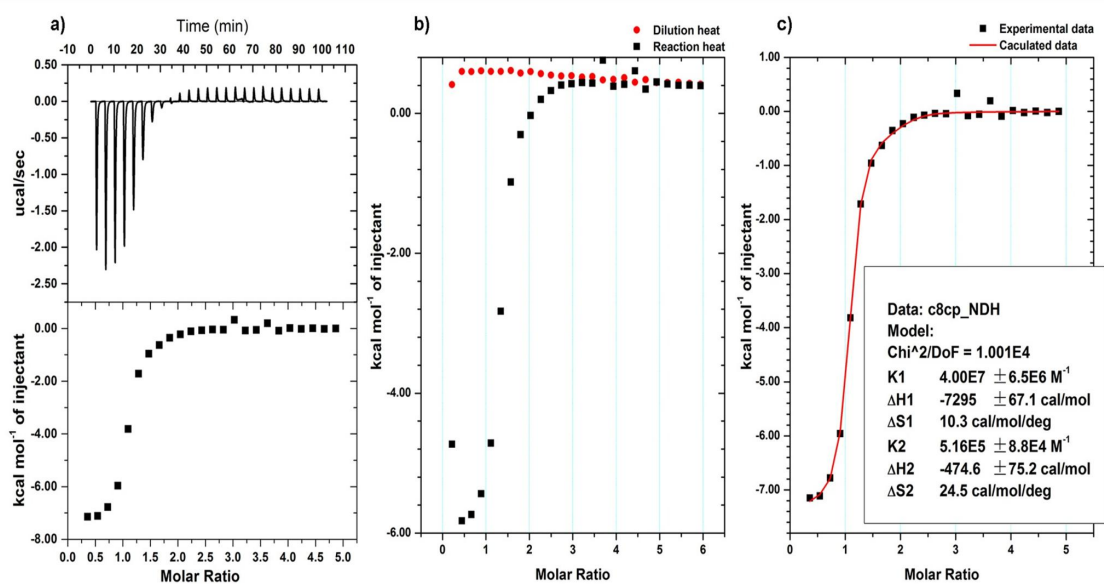

**Figure S12.** Calorimetric titrations in aqueous solution for sequential 25 injections (10  $\mu\text{L}$  per injection) of injecting CD-PY solution (1.10 mM) into CB[8] solution (0.043 mM): (a) raw data and apparent reaction heat; (b) heat effects of the dilution and of the complexation reaction; (c) "Net" heat effects fitted using the "Sequential Binding Sites" model. The thermodynamic data in CD-PY@CB[8] complex were obtained as  $K_{a1} = (4.00 \pm 0.65) \times 10^7 \text{ M}^{-1}$ ,  $K_{a2} = (5.16 \pm 0.88) \times 10^5 \text{ M}^{-1}$ , respectively.

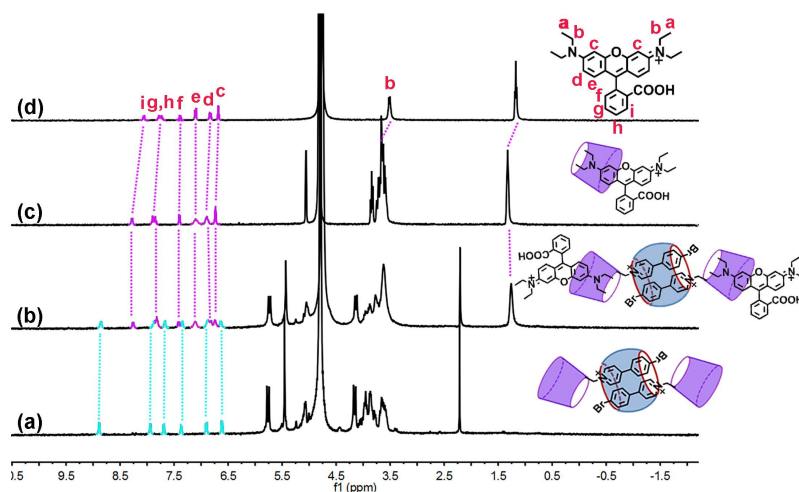

**Figure S13.**  $^1\text{H}$  NMR spectra (400 MHz,  $\text{D}_2\text{O}$ , 298 K) of (a) CD-PY@CB[8] (1:0.5), (b) CD-PY@CB[8]@RhB (1:0.5:1), (c)  $\beta$ -CD@RhB (1:1) and (d) RhB ( $[\text{RhB}] = 1 \text{ mM}$ ).

2

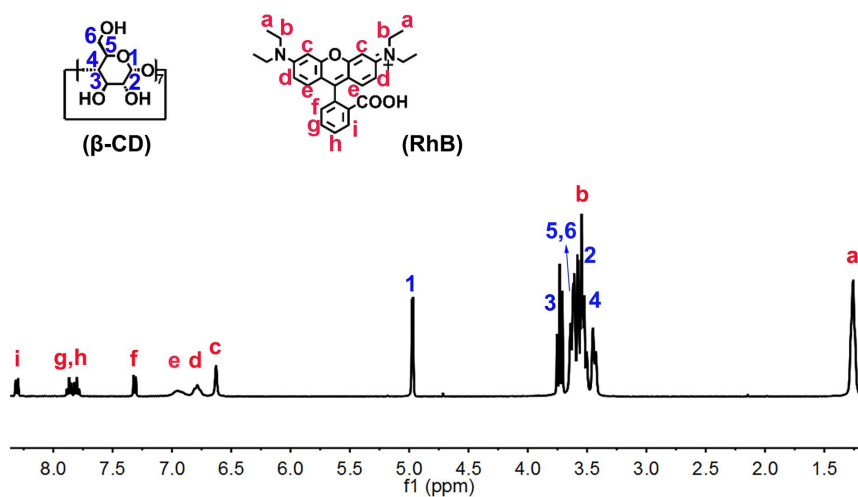

**Figure S14.**  $^1\text{H}$  NMR spectrum of  $\beta$ -CD@RhB (1:1) (400 MHz,  $\text{D}_2\text{O}$ , 298 K,  $[\beta\text{-CD}] = [\text{RhB}] = 1 \text{ mM}$ ).

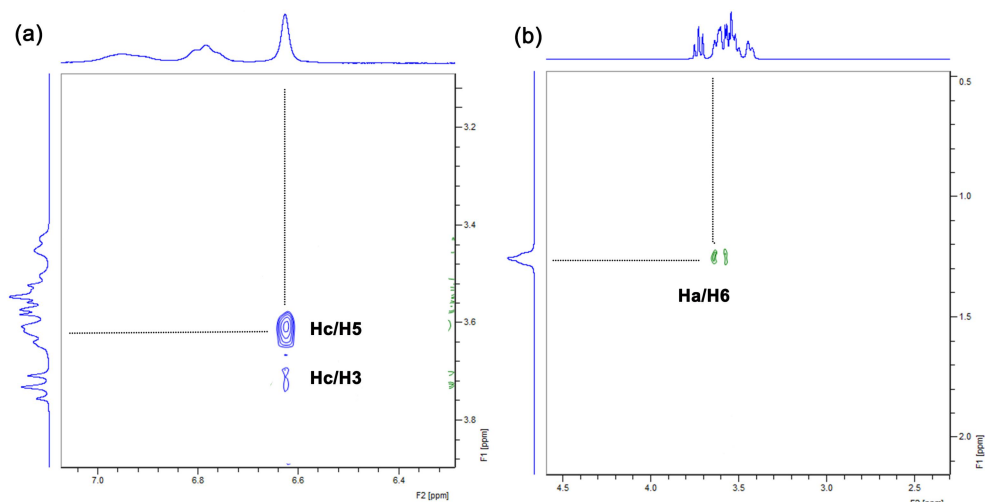

**Figure S15.** Zoomed view of the ROESY spectrum of  $\beta$ -CD@RhB (1:1) (400 MHz, D<sub>2</sub>O, 298 K,  $[\beta$ -CD] = [RhB] = 1 mM).

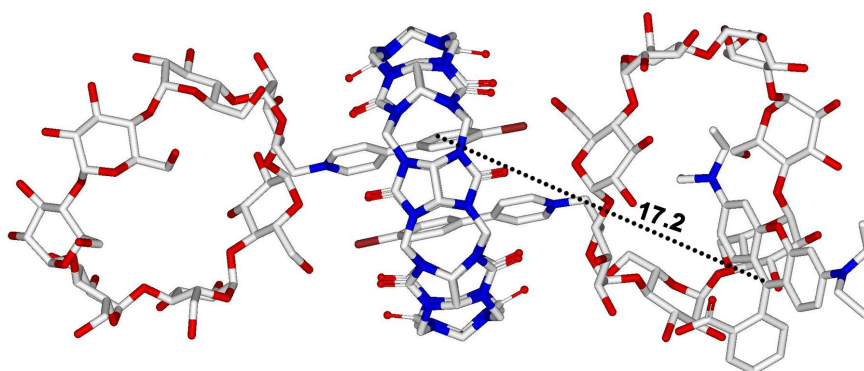

**Figure S16.** The geometry optimized by the molecular mechanics modelling using the universal force field<sup>1</sup> by Gaussian 16<sup>2</sup> and rendered by CYL view<sup>3</sup>. The distance between RhB and PY unit in the host-guest complexes was calculated to be 17.2 Å.

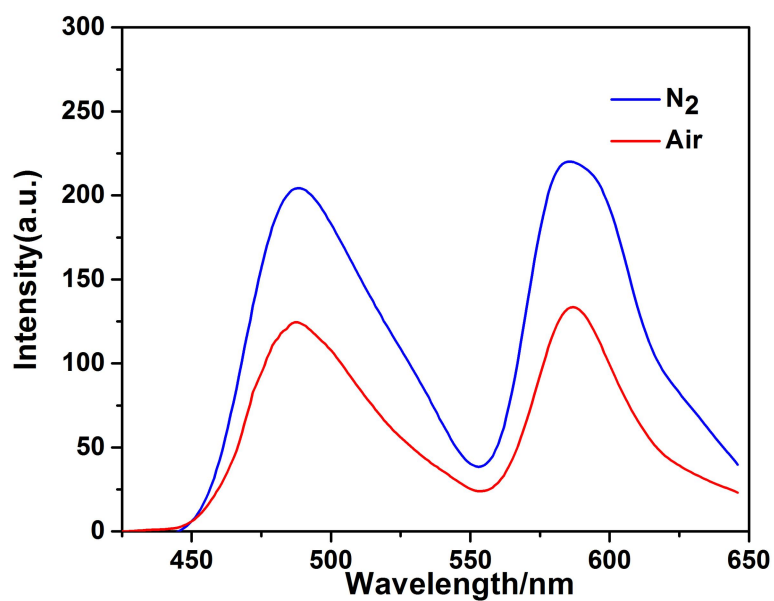

**Figure S17.** Gated emission spectra of CD-PY@CB[8]@RhB (1:0.5:0.02) with or without N<sub>2</sub> in aqueous solution (Ex =340 nm, [CD-PY]=  $5 \times 10^{-4}$  M, 298 K).

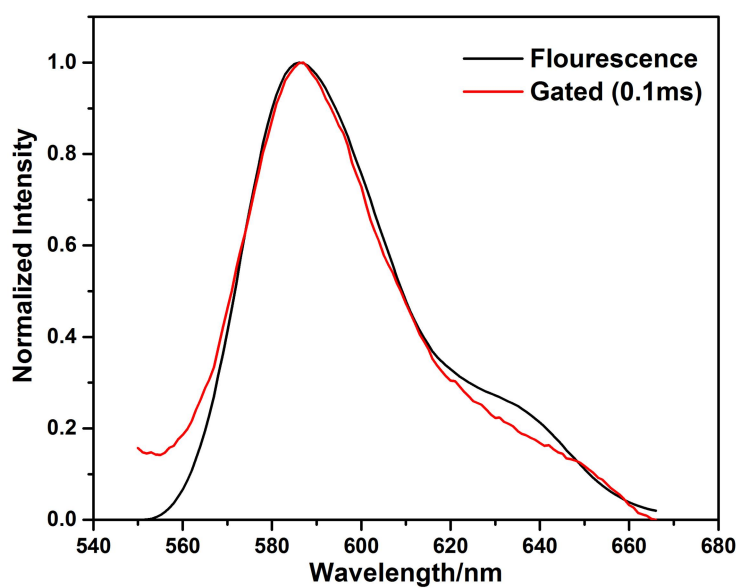

**Figure S18.** Normalized fluorescence and gated emission spectra of CD-PY@CB[8]@RhB in the solution (1:0.5:0.02) (Ex =340 nm, [CD-PY]=  $5 \times 10^{-4}$  M, 298 K).

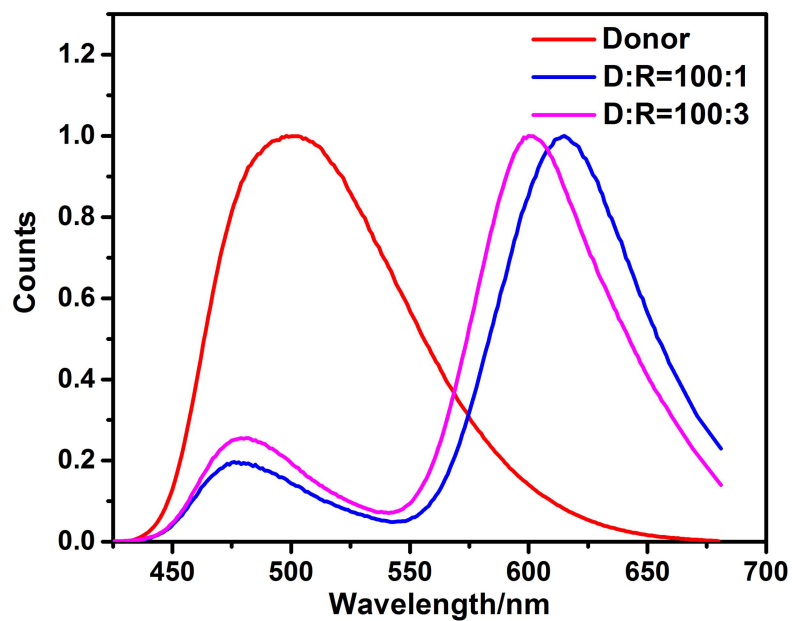

**Figure S19.** Normalized gated spectra (delayed 0.1 ms) of CD-PY in solid state with different concentrations of RhB (Ex =320 nm).

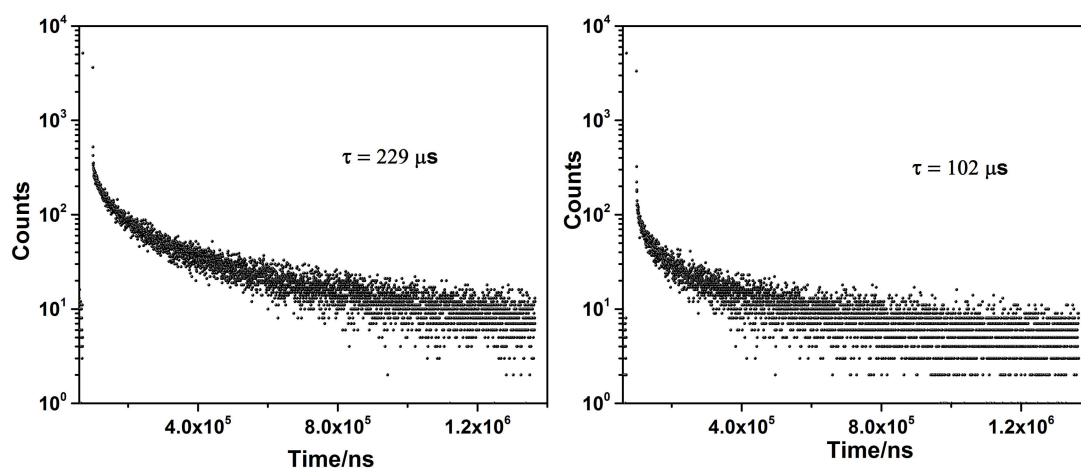

**Figure S20.** Decay curves of CD-PY in the presence of (a) 1%, and (a) 3% RhB in solid state (Ex =320 nm).

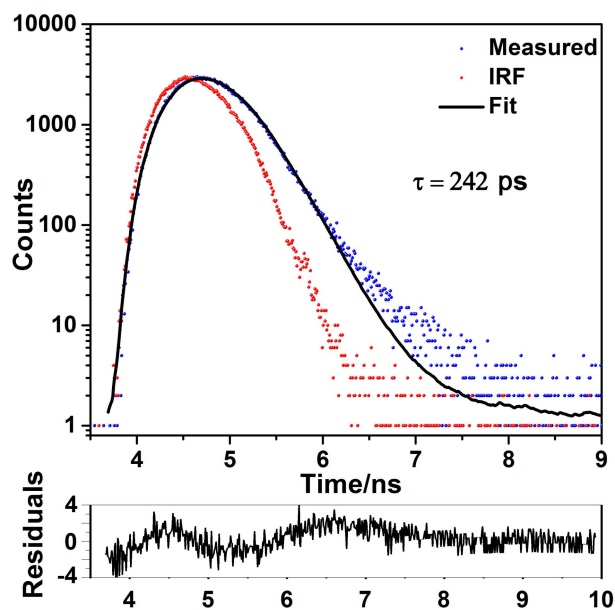

**Figure S21.** Fluorescence lifetime curve of CD-PY@CB[8]@RhB (1: 0.5: 0.02) aqueous solution at 384 nm ( $[\text{CD-PY}] = 5.0 \times 10^{-4} \text{ M}$ , 298 K)..

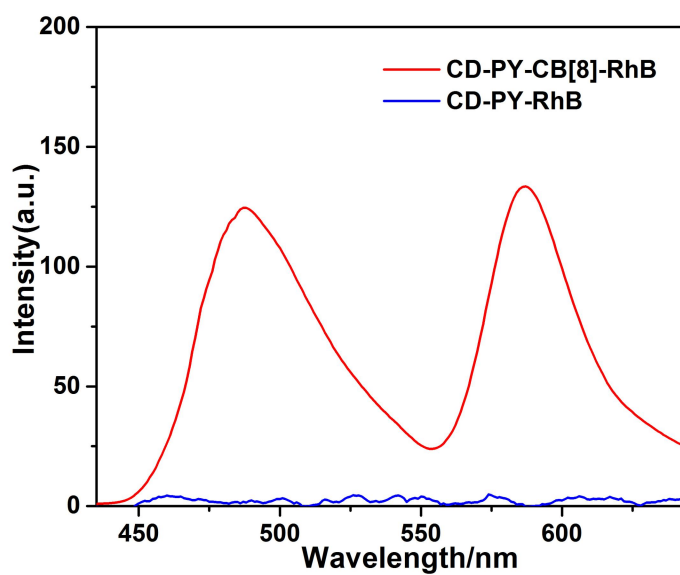

**Figure S22.** Gated emission spectra of CD-PY@CB[8]@RhB (1:0.5:0.02), and CD-PY@RhB (1:0.02) in aqueous solution ( $[\text{CD-PY}] = 5 \times 10^{-4} \text{ M}$ , Ex = 340 nm, 298 K).

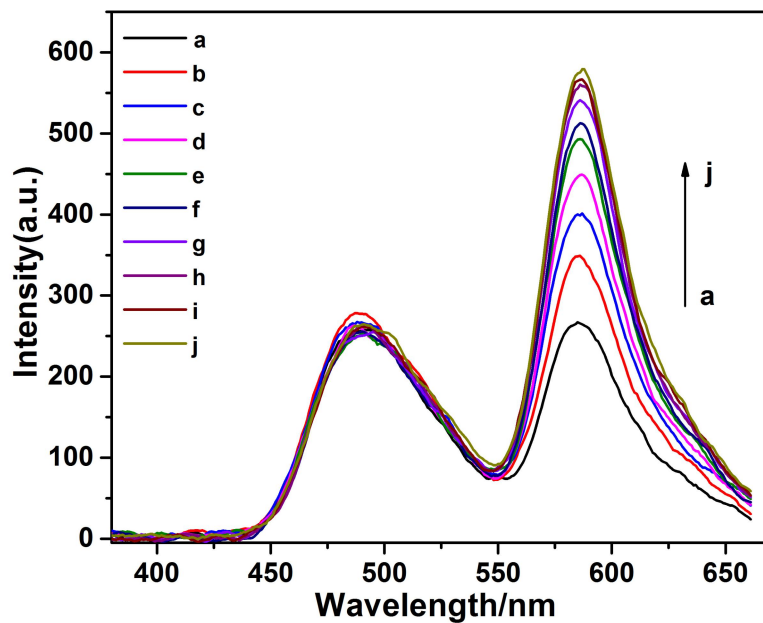

**Figure S23.** Gated emission spectra of CD-PY@CB[8]@RhB (1:0.5:0.02) upon the gradual addition of HA-ADA in aqueous solution ( $[\text{CD-PY}] = 5 \times 10^{-4} \text{ M}$ ,  $[\text{HA-ADA}] = 0-1.55 \times 10^{-4} \text{ M}$ ) at 298 K (Ex. Slit =10, Em. Slit=20).

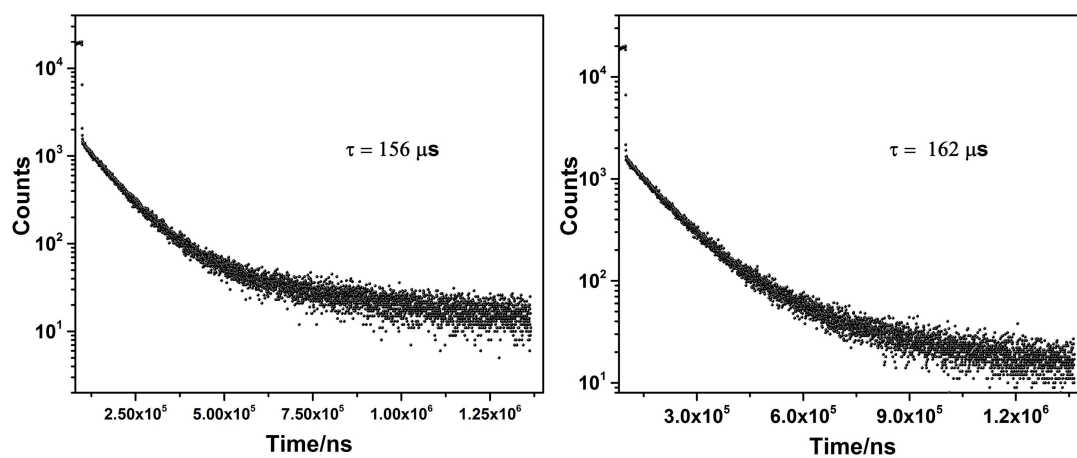

**Figure S24.** Decay curves of (a) CD-PY@CB[8]@RhB (1:0.5:0.02), and (b) CD-PY@CB[8]@RhB@HA-ADA (1:0.5:0.02:0.31) in water at 500 nm, at 298 K.



**Table S1.** Summary of all lifetimes used by different exponential decay.

| Figures          | Lifetime (us) (% contribution) |                   |                   |        |
|------------------|--------------------------------|-------------------|-------------------|--------|
|                  | $\tau_1$                       | $\tau_2$          | $\tau_3$          | $\tau$ |
| <b>Fig. 2d</b>   | 37.46<br>0.13%                 | 405.50<br>84.26%  | 1040.62<br>15.62% | 504    |
| <b>Fig. 3d</b>   | 215.21<br>43.46%               | 1214.52<br>56.54% | -                 | 780    |
| <b>Fig. 4b</b>   | 0.18<br>0.1%                   | 199<br>45.75%     | 365<br>54.15 %    | 289    |
| <b>Fig. S10</b>  | 1.17<br>22.63%                 | 5.73<br>20.94%    | 43.18<br>56.43%   | 25.8   |
| <b>Fig. S20a</b> | 42.19<br>24.75%                | 295.70<br>73.85%  | 0.13<br>1.40%     | 229    |
| <b>Fig. S20b</b> | 0.139<br>6.06%                 | 108.59<br>93.94%  | -                 | 102    |
| <b>Fig. S24a</b> | 85<br>76.56%                   | 390<br>23.44%     | -                 | 156    |
| <b>Fig. S24b</b> | 102<br>73.35%                  | 324<br>26.65%     | -                 | 162    |

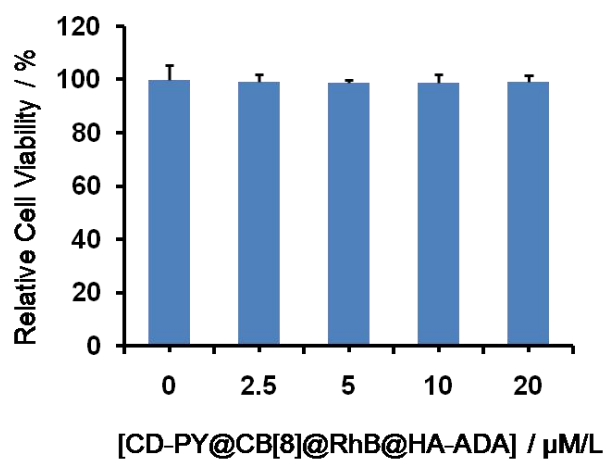

**Figure S25.** Relative cell viabilities of CD-PY@CB[8]@RhB@HA-ADA (1:0.5:0.02:0.31) at different concentrations. (Concentrations in the Figure represent [CD-PY]).

### 3. Methods

### 3.1 Energy-transfer efficiency ( $\Phi_{ET}$ )

Energy-transfer efficiency ( $\Phi_{ET}$ ) was calculated according to the equation (1).<sup>4</sup>

$$\Phi_{ET} = 1 - I_{DA}/I_D \quad (1)$$

In the equation,  $I_{DA}$  and  $I_D$  are the emission intensity of the ET donor with and without the presence of ET acceptor, respectively. The  $\Phi_{ET}$  was calculated as 84% in water, measured in the condition of CD-PY@CB[8]@RhB (1:0.5:0.02),  $\lambda_{ex} = 340$  nm.

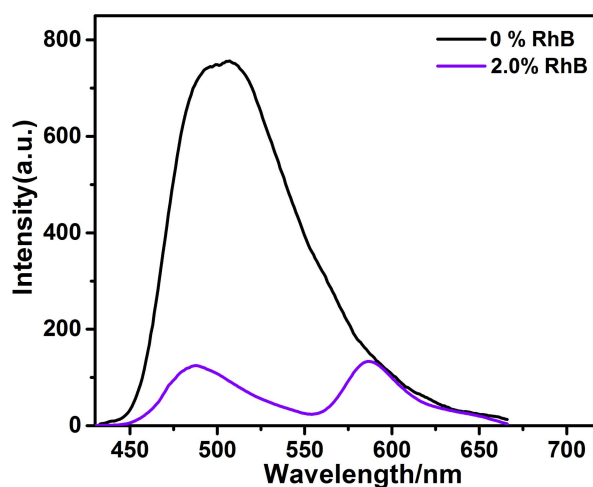

**Figure S26.** Phosphorescence spectra of CD-PY@CB[8] (1:0.5) with or without RhB in water ( $[CD-PY] = 5 \times 10^{-4}$  M,  $\lambda_{ex} = 340$  nm).

### 3.2 Antenna effect

The antenna effect under certain concentrations of donor and acceptor was calculated according to the equation (2)<sup>5</sup>

$$\text{Antenna effect} = \frac{I_{DA}(\lambda_{ex} = 340 \text{ nm}) - I_D(\lambda_{ex} = 340 \text{ nm})}{I_{DA}(\lambda_{ex} = 550 \text{ nm})} \quad (2)$$

In the equation,  $I_{DA}(\lambda_{ex} = 340 \text{ nm})$  and  $I_{DA}(\lambda_{ex} = 550 \text{ nm})$  are the phosphorescence intensities of excitation of the ET donor with the presence of ET acceptor at 340 nm and direct excitation of the acceptor at 550 nm, respectively. The

antenna effect value was calculated as 36.42 in water, measured in the condition of CD-PY@CB[8]@RhB (1:0.5:0.02) ( $\lambda_{\text{ex}} = 340 \text{ nm}$  or  $550 \text{ nm}$ ).

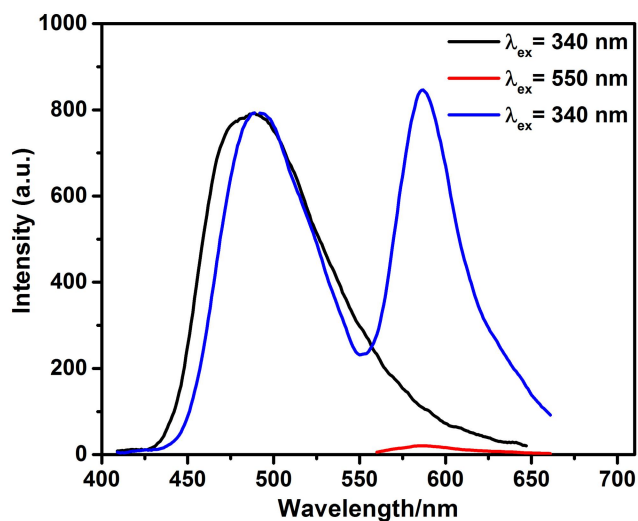

**Figure S27.** Gated spectra of CD-PY@CB[8]@RhB (1:0.5:0.02) under different excitation conditions in water, blue trace ( $\lambda_{\text{ex}} = 340 \text{ nm}$ ), red trace ( $\lambda_{\text{ex}} = 550 \text{ nm}$ ). The black trace represents the gated spectrum ( $\lambda_{\text{ex}}=340 \text{ nm}$ ) of CD-PY@CB[8], which was normalized according to the phosphorescence intensity at  $490 \text{ nm}$  of the blue trace ( $[\text{CD-PY}]=5 \times 10^{-4} \text{ M}$ ).

#### 4. REFERENCES

- (1) A. K. Rappé, C. J. Casewit, K. S. Colwell, W. A. Goddard III, W. A. Skiff, *J. Am. Chem. Soc.*, 1992, **114**, 10024-10035.
- (2) M. J. Frisch, G. W. Trucks, H. B. Schlegel, G. E. Scuseria, M. A. Robb, J. R. Cheeseman, G. Scalmani, V. Barone, G. A. Petersson, H. Nakatsuji, X. Li, M. Caricato, A. V. Marenich, J. Bloino, B. G. Janesko, R. Gomperts, B. Mennucci, H. P. Hratchian, J. V. Ortiz, A. F. Izmaylov, J. L. Sonnenberg, D. Williams-Young, F. Ding, F. Lipparini, F. Egidi, J. Goings, B. Peng, A. Petrone, T. Henderson, D. Ranasinghe, V. G. Zakrzewski, J. Gao, N. Rega, G. Zheng, W. Liang, M. Hada, M. Ehara, K. Toyota, R. Fukuda, J. Hasegawa, M. Ishida, T. Nakajima, Y. Honda, O. Kitao, H. Nakai, T. Vreven, K. Throssell, J. A. Montgomery, Jr., J. E. Peralta, F. Ogliaro, M. J. Bearpark, J. J. Heyd, E. N. Brothers, K. N. Kudin, V. N. Staroverov, T. A. Keith, R. Kobayashi, J. Normand, K. Raghavachari, A. P. Rendell, J. C. Burant, S. S. Iyengar, J. Tomasi, M. Cossi, J. M. Millam, M. Klene, C. Adamo, R. Cammi, J. W. Ochterski, R. L. Martin, K. Morokuma, O. Farkas, J. B. Foresman, and D. J. Fox, Gaussian 16, Revision A.03, Gaussian, Inc., Wallingford, CT, 2016.
- (3) C. Y. Legault, CYLview, 1.0b, Université de Sherbrooke, Sherbrooke, Quebec, Canada, 2009, <http://www.cylview.org>.
- (4) Z. Li, Y. Han, F. Wang, *Nat. Commun.*, 2019, **10**, 3735.
- (5) J.-J. Li, Y. Chen, J. Yu, N. Cheng, Y. Liu, *Adv. Mater.*, 2017, **29**, 1701905.
